# Supplementary material for: Regulatory Hotspots in the Malaria Parasite Genome Dictate Transcriptional Variation
Source: PubMed Central journal article supplement (PMC2553844; doi:10.1371/journal.pbio.0060238), 2008-09-30

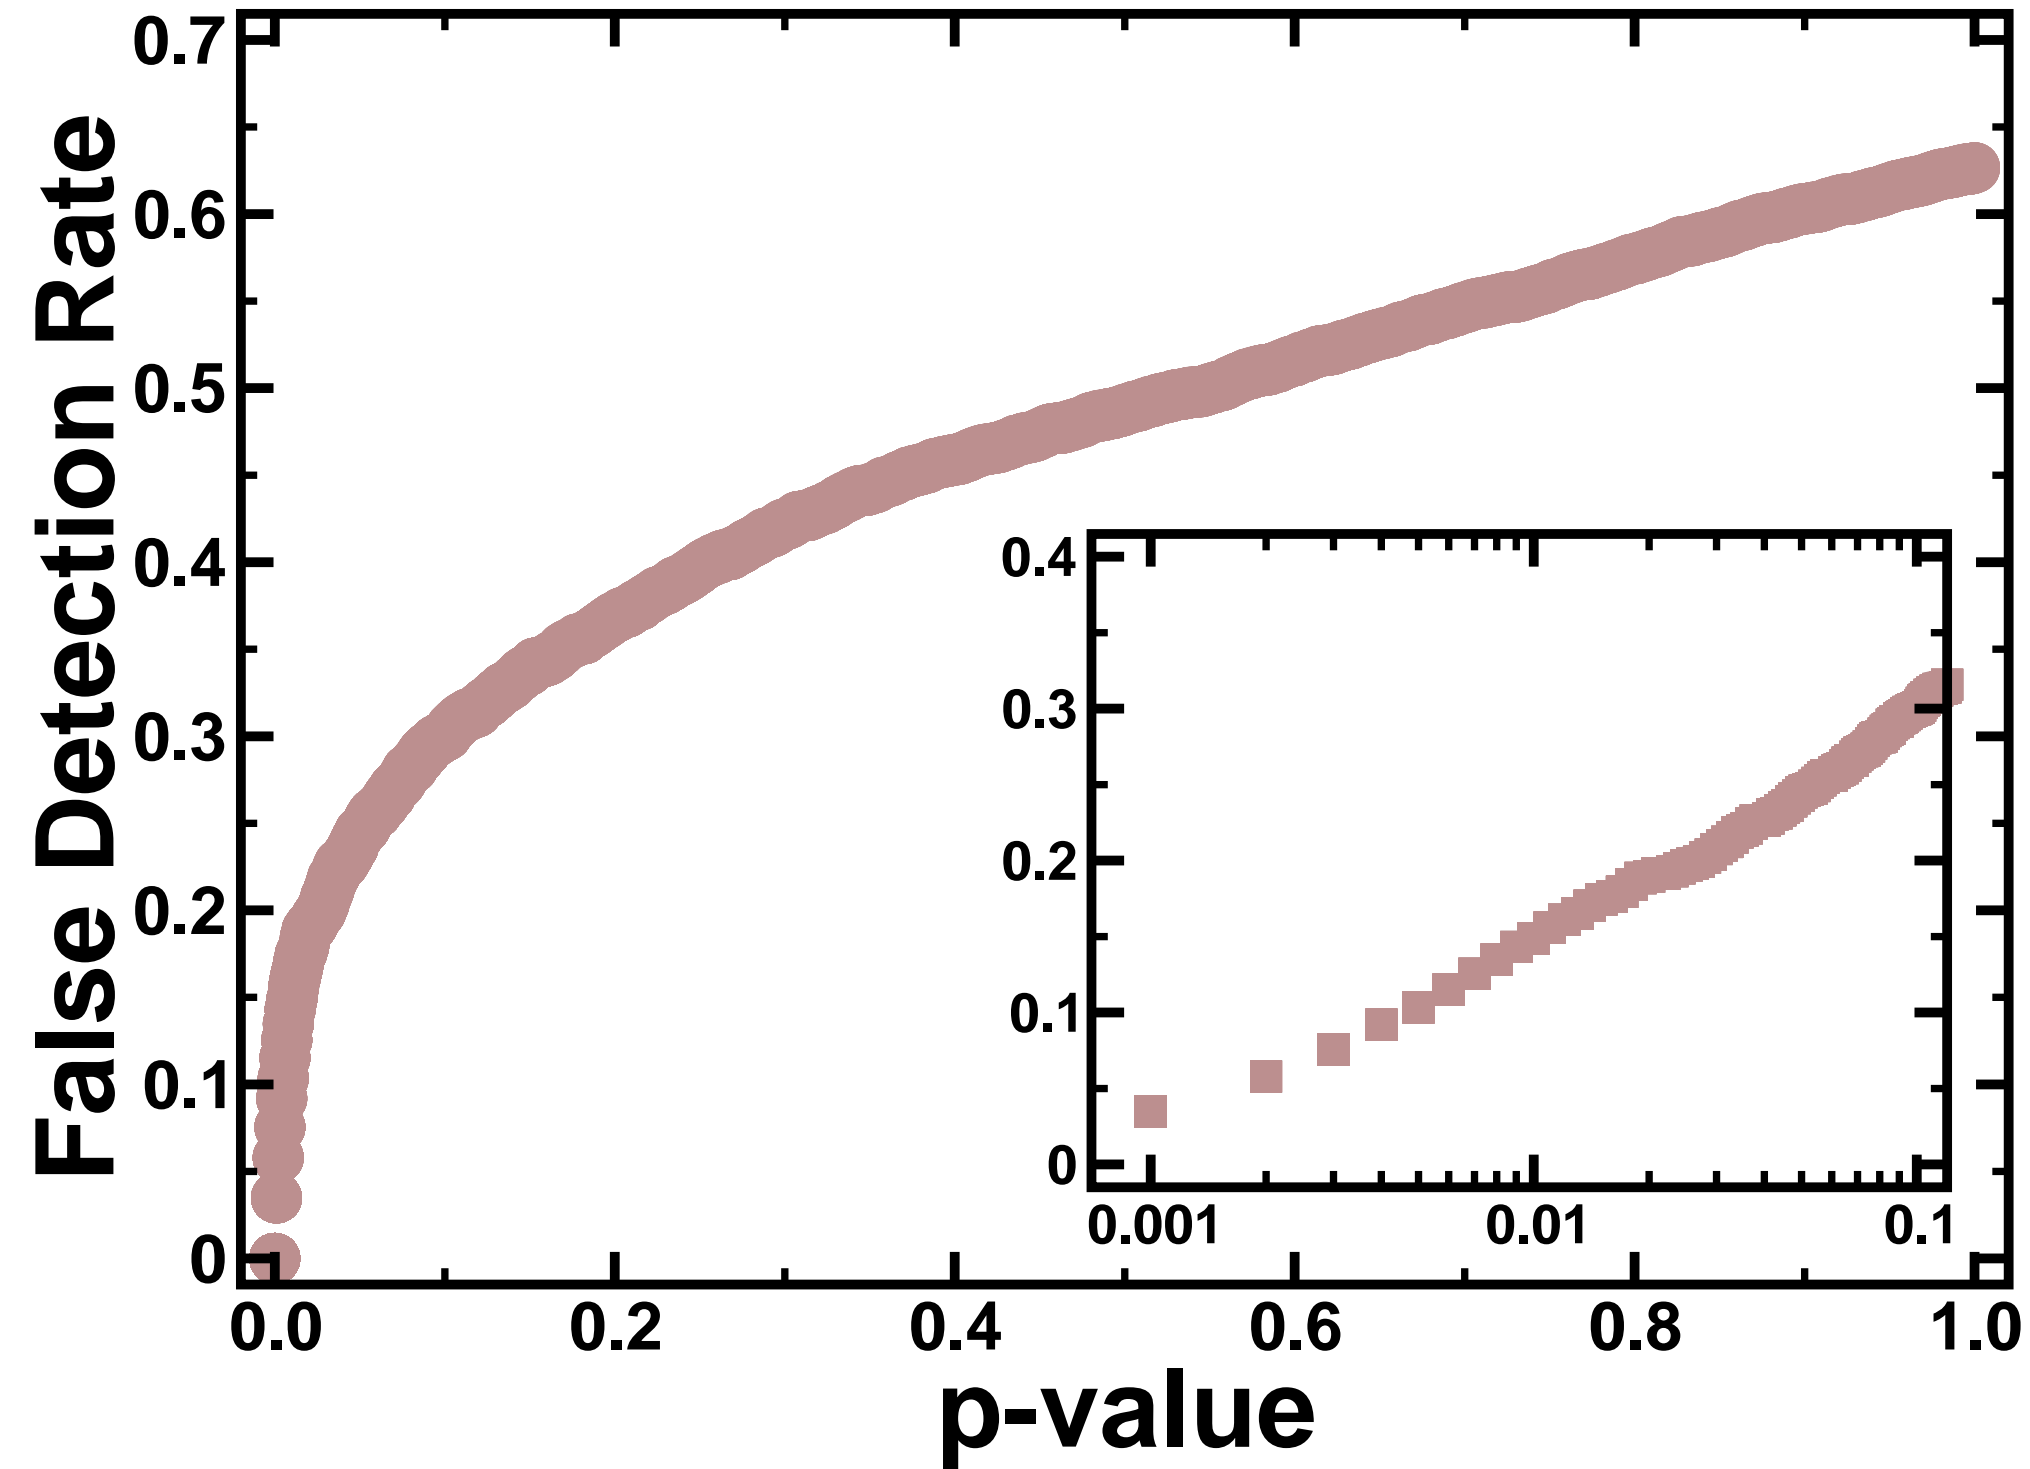

Supplement: pbio.0060238.sg001.pdf [file pbio.0060238.sg001.pdf]
